# Supplementary material
Source: PubMed Central journal article supplement (PMC6483506)
Supplement: jciinsight-4-122058-s113.pdf [file jciinsight-4-122058-s113.pdf]

## Online Supplemental Information

The additional information presented in the Online Supplement includes:

### A. Three figures of additional results to extend data reported in the main manuscript.

1. Supplement Figure S1 (related to Figure 4 in main manuscript)

Plot of increases in body weight of individual mice recorded weekly from week 15 to week 48.

Comparisons between the two groups *Ano2*<sup>+/+</sup> vs. *Ano2*<sup>+/-</sup> confirm the greater increase in weight of the heterozygotes.

2. Supplement Figure S2 (related to Figure 5 in the main manuscript)

Data extend the information on metabolic changes in heterozygotes (*Ano2*<sup>+/-</sup>) and littermate controls (*Ano2*<sup>+/+</sup>) reported in Figure 5. The respiratory exchange ratio and sleep time were not significantly different between the two groups.

3. Supplement Figure S3 (related to Figure 3 and 4 in the main text)

The results in the main text report mRNA expression of *Ano1*, *Ano2*, *CCK1R* and *CCK2R* and the CCK-induced current all in nodose ganglia and nodose neurons. This supplemental Figure S3 reports similar data on DRG ganglia and neurons in contrast to NG. The values in DRG are significantly lower than those in NG. The results support the likelihood that the phenotype of the *TMEM16B* heterozygote KO may reflect a more prominent suppression of CCK activation of vagal nodose ganglia afferents than DRG afferents.

### B. Two additional fluorescence Figures S4 & S5 (that complement Figure 3 in the main text):

1. Figure S4 confirms decreased fluorescence of *TMEM16A* and *B* and preserved nuclear staining with DAPI in a section of NG from a mouse on HFD.

2. Figure S5 confirms the *TMEM16B* expression in nodose neurons in culture and localization of *TMEM16B* on the cytoplasmic membrane of cultured neurons.

### C. Three Tables:

1. Table S1 provides additional data and results of ANOVA contrasting metabolic responses in *Ano2*<sup>+/-</sup> vs. *Ano2*<sup>+/+</sup> mice.

2. Table S2 provides a list of key resources that were used for all materials and animals.

3. Table S3 includes selected primer sequences.

## SUPPLEMENTAL INFORMATION

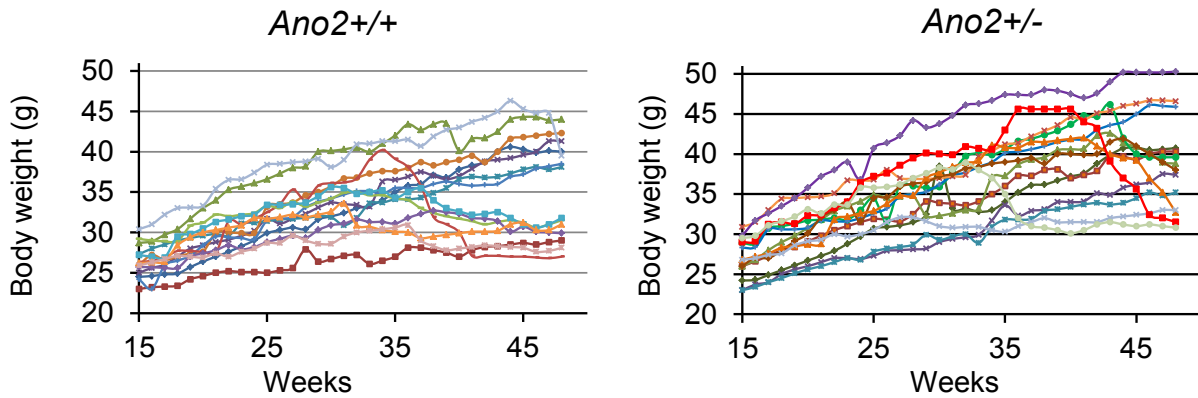

**Figure S1. Plot of individual mice body weight up to 48 weeks. Related to Figure 4.**

Body weights of control (*Ano2*<sup>+/+</sup>) and *Nav1.8Cre;Ano2*<sup>fl/wt</sup> (*Ano2*<sup>+/-</sup>) mice. The weight increase in *Ano2*<sup>+/-</sup> mice (n=14) was significantly greater than the wild type controls (*Ano2*<sup>+/+</sup>; n=14). In a few mice, body weight declined abruptly toward the end of the follow-up period without any obvious explanation. In those mice, the maximal weight attained was included in the calculation of the group means in figure 4B.

Each dot represents a weekly weight and each line connects the weekly weights of each mouse.

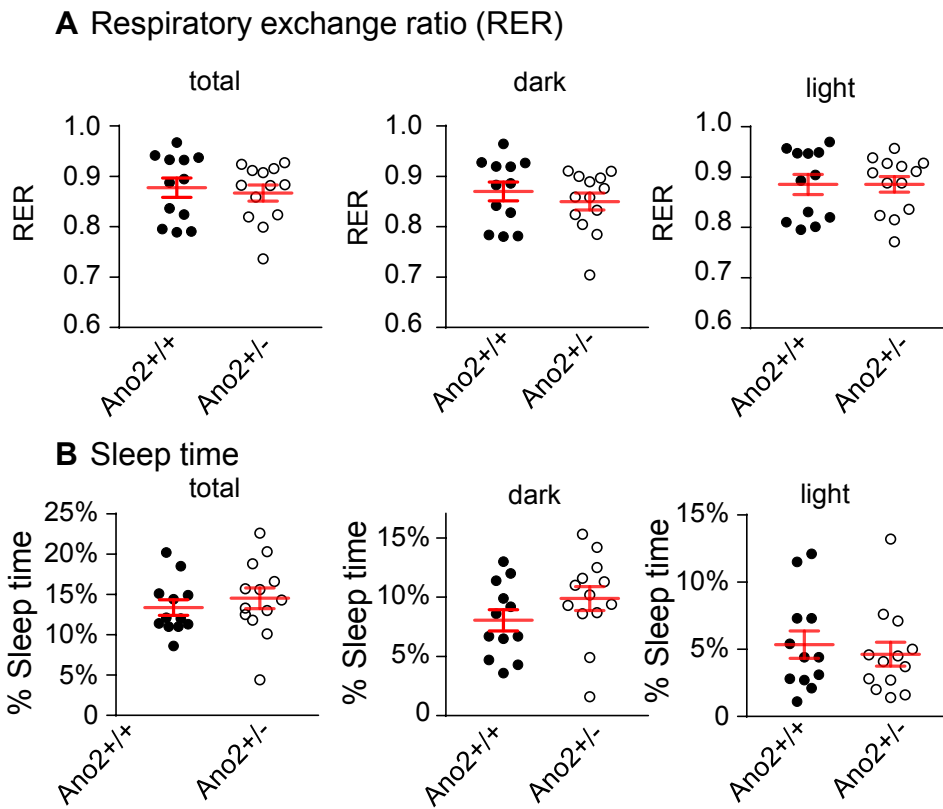

**Figure S2. Changes in respiratory exchange ratio and sleep time in control (*Ano2*<sup>+/+</sup>) vs *Nav1.8* *Cre*;*Ano2*<sup>fl/wt</sup> (*Ano2*<sup>+/-</sup>) mice**

**A.** The respiratory exchange ratio (RER) in control vs. *Ano2*<sup>+/-</sup> mice is  $0.88 \pm 0.02$  vs.  $0.87 \pm 0.02$  for 24 hours total RER (left panel),  $0.89 \pm 0.02$  vs.  $0.89 \pm 0.02$  in light phase (right panel) and  $0.87 \pm 0.02$  vs.  $0.85 \pm 0.02$  in dark phase (middle panel;  $p > 0.05$  for all comparisons).

**B.** The percentile sleep time of control vs. *Ano2*<sup>+/-</sup> mice is  $13.4 \pm 1.0\%$  vs.  $14.5 \pm 1.3\%$  of 24 hours total seep time (left panel),  $5.4 \pm 1.0\%$  vs.  $4.6 \pm 0.9\%$  at light phase (right panel) and  $8.1 \pm 0.9\%$  vs.  $9.9 \pm 1.0\%$  at dark phase (middle panel;  $p > 0.05$  for all comparisons).

Data are presented as means  $\pm$  s.e.m., unpaired two-tailed student's t test, each data point represents one individual mouse.

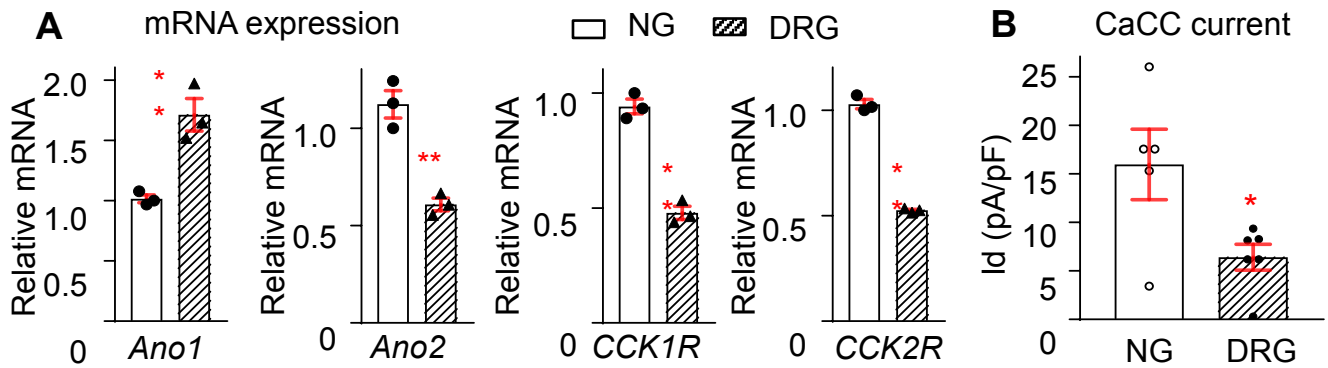

**Figure S3. Expression of *Ano2*, *CCK1* and *CCK2* receptors are lower in DRG compared to NG.**

**A.** The relative mRNA levels in NG (open bars) vs. DRG (shaded bars) are  $1.02 \pm 0.03$  vs.  $1.71 \pm 0.13$  for *Ano1*;  $1.12 \pm 0.07$  vs.  $0.61 \pm 0.03$  for *Ano2*;  $0.94 \pm 0.03$  vs.  $0.48 \pm 0.03$  for *CCK1R*; and  $1.03 \pm 0.02$  vs.  $0.53 \pm 0.01$  for *CCK2R*. \*\* $p < 0.01$ , each data point represents two ganglia from one mouse. **B.** The CCK-induced CaCC currents that are inhibited by 300  $\mu\text{M}$  NFA in nodose (NG) vs. DRG neurons are  $15.9 \pm 3.6$  vs.  $6.4 \pm 1.3$  pA/pF. \* $p < 0.05$ , each data point represents one neuron (from 4 nodose and 4 DRG ganglia obtained from 2 mice).

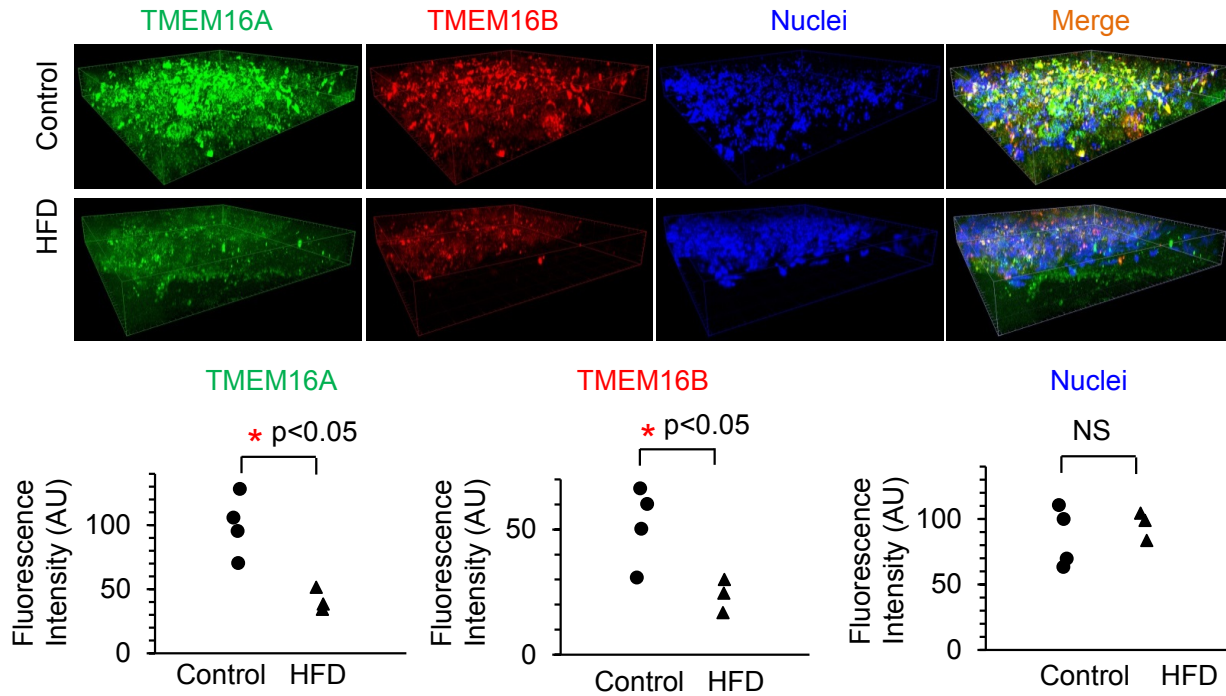

**Figure S4. Expression of TMEM16A and B is lower in nodose neurons from mice fed HFD.**

A different slice from Figure 3D shows that fluorescence intensity of TMEM16A (green) and B (red) detected by immunohistochemistry are lower in nodose neurons from mice fed a HFD. The values in the graphs show that the quantification of their fluorescence intensity are the same as those shown in **Figure 3** in the main manuscript. The asterisks (\*) indicate statistically significant differences. The nuclei (blue) dyed by DAPI shows no difference in fluorescence intensity, suggesting a comparable cell number in nodose ganglia from both groups of mice.

**A** TMEM16B protein expression in nodose neurons

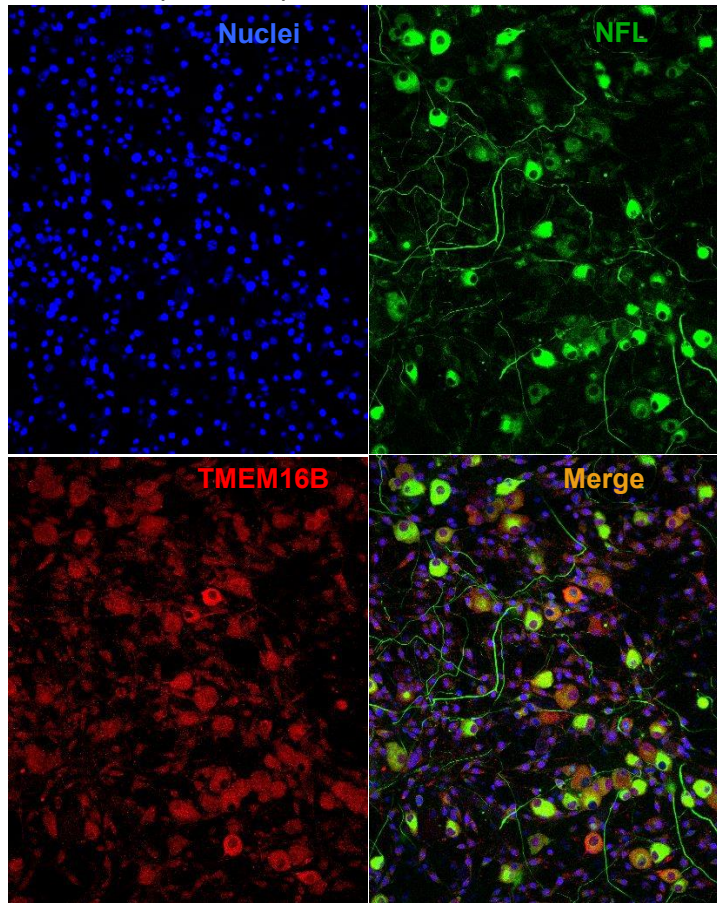

**B** TMEM16B expression on the membrane

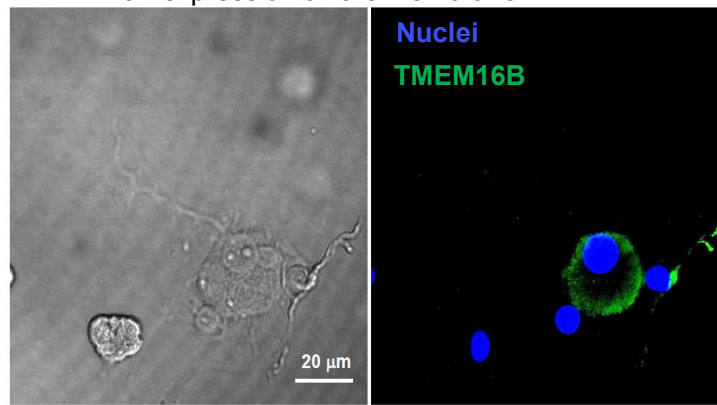

**Figure S5. Expression of TMEM16B protein in nodose neurons.**

**A.** DAPI fluorescence of nuclei (blue) and TMEM16B protein stained with anti-Ano2 antibody (red fluorescence) in cultured nodose neurons, which are also labeled by neurofilament light chain (NFL, green).

**B.** TMEM16B is expressed on the cytoplasmic membrane of the cultured nodose neuron.

**Table S1. *Nav1.8Cre;Ano2<sup>fl/wt</sup>* (*Ano2*<sup>+/-</sup>) and littermate control (*Ano2*<sup>+/+</sup>) mice**

| Measurement                                                                                                        | <i>Ano2</i> <sup>+/+</sup> mice | <i>Ano2</i> <sup>+/-</sup> mice |
|--------------------------------------------------------------------------------------------------------------------|---------------------------------|---------------------------------|
| <b>Baseline 24-hour food intake</b>                                                                                |                                 |                                 |
| Baseline 24-hour food intake light phase (g)                                                                       | 1.08±0.20                       | 0.75±0.08                       |
| Baseline 24-hour food intake dark phase (g)                                                                        | 1.88±0.14                       | 1.84±0.09                       |
| <b>Energy expenditure</b>                                                                                          |                                 |                                 |
| Energy expenditure light phase (Kcal/g)                                                                            | 0.090±0.003                     | 0.083±0.002                     |
| Energy expenditure dark phase (Kcal/g)                                                                             | 0.110±0.004                     | 0.103±0.003                     |
| Locomotor activity light phase count (×10 <sup>4</sup> )                                                           | 2.20±0.19                       | 1.61±0.11*                      |
| Locomotor activity dark phase count (×10 <sup>4</sup> )                                                            | 4.73±0.49                       | 4.04±0.40                       |
| <b>Glucose tolerance test (glucose level after 2 mg/g body weight glucose injection) (mg/dl)</b>                   |                                 |                                 |
| before                                                                                                             | 136.0±11.1                      | 124.3±12.3                      |
| 30 min                                                                                                             | 459.0±37.6                      | 390.1±35.9                      |
| 60 min                                                                                                             | 314.9±36.8                      | 235.6±20.2                      |
| 120 min                                                                                                            | 171.2±20.8                      | 140.8±9.5                       |
| <b>Insulin tolerance test (glucose level after 0.75×10<sup>-3</sup> U/g body weight insulin injection) (mg/dl)</b> |                                 |                                 |
| before                                                                                                             | 206.6±9.2                       | 185.9±6.7                       |
| 15 min                                                                                                             | 177.3±13.0                      | 170.7±10.8                      |
| 60 min                                                                                                             | 109.0±15.3                      | 103.3±11.1                      |
| 120 min                                                                                                            | 110.8±10.7                      | 110.0±10.0                      |

Data are presented as means ± s.e.m.; \* p<0.05 indicates significant difference between *Ano2*<sup>+/+</sup> and *Ano2*<sup>+/-</sup> by unpaired two-tailed student's t test, and † indicates significant differences between *Ano2*<sup>+/+</sup> and *Ano2*<sup>+/-</sup> by ANOVA for cumulative 24 hours changes of energy expenditure, locomotor activity, and for glucose tolerance levels over a period of 120 minutes.

There were no significant difference in respiratory exchange ratios or sleep time between *Ano2*<sup>+/+</sup> and *Ano2*<sup>+/-</sup> mice (data shown in Supplemental Figure S2).

**Table S2. Key resources that were used for all materials and animals**

| <b>REAGENT or RESOURCE</b>                                                     | <b>SOURCE</b>               | <b>IDENTIFIER</b>            |
|--------------------------------------------------------------------------------|-----------------------------|------------------------------|
| <b>Antibodies</b>                                                              |                             |                              |
| <b>Goat polyclonal anti-Ano1</b>                                               | Santa Cruz Biotechnology    | Cat # sc-69343, lot # E2714  |
| <b>Rabbit polyclonal anti-Ano2</b>                                             | Santa Cruz Biotechnology    | Cat # sc-292004, lot # E2813 |
| <b>donkey anti-goat IgG-FITC</b>                                               | Santa Cruz Biotechnology    | Cat# sc-2024                 |
| <b>mouse anti-rabbit IgG-TR</b>                                                | Santa Cruz Biotechnology    | Cat# sc-3917                 |
| <b>Virus Strains</b>                                                           |                             |                              |
| <b>ANO2 shRNA (m) Lentiviral Particles</b>                                     | Santa Cruz Biotechnology    | SC-154400-V                  |
| <b>Rodent Diet</b>                                                             |                             |                              |
| <b>NIH-31 Modified Open Formula Mouse/Rat sterilizable diet</b>                | ENVIGO                      | Cat# 7913                    |
| <b>Rodent Diet with 60% kcal% fat</b>                                          | Research Diets INC.         | Cat# D12492                  |
| <b>Rodent Diet with 45%kcal% fat</b>                                           | Research Diets INC.         | Cat# D12451                  |
| <b>Chemicals, Peptides and Recombinant Proteins</b>                            |                             |                              |
| <b>(Tyr[S03H]27)Cholecystokinin fragment 26-33 Amide</b>                       | Sigma-Aldrich               | Cat# C2175                   |
| <b>CCK Octapeptide, sulfated</b>                                               | Tocris Bioscience           | Cat#1166                     |
| <b>Molecular Probes™ Fluo-4, AM</b>                                            | Invitrogen Molecular Probes | Cat# 10378062                |
| <b>Pluronic™ F-127</b>                                                         | Invitrogen Molecular Probes | Cat# P6867                   |
| <b>T16A<sub>inh-A01</sub></b>                                                  | Sigma-Aldrich               | Cat# 613551                  |
| <b>Niflumic Acid</b>                                                           | Sigma-Aldrich               | Cat# N0630                   |
| <b>DiI (1,1'-Diocadecyl-3,3,3',3'-tetramethylindocarbocyanine perchlorate)</b> | Molecular Probes            | Cat# D282                    |
| <b>TRIzol reagent</b>                                                          | Life Technologies           | Cat# 15596018                |



|                                                |                      |             |
|------------------------------------------------|----------------------|-------------|
| <b>DNA-free™ DNA Removal Kit</b>               | Ambion               | Cat# AM1906 |
| <b>RNeasy Micro Kit</b>                        | Qiagen               | Cat# 74004  |
| <b>AffinityScript QPCR cDNA Synthesis Kit</b>  | Agilent Technologies | Cat# 600559 |
| <b>Brilliant II SYBR Green qPCR Master Mix</b> | Agilent Technologies | Cat# 600828 |
| <b>Vectashield Mounting Medium</b>             | Vector Laboratories  | Cat# H-1500 |

### Experimental Models: Organisms/Strains

|                                           |                            |                     |
|-------------------------------------------|----------------------------|---------------------|
| <b>Mouse: C57BL/6</b>                     | The Jackson Laboratory     | Stock Number 000664 |
| <b>Mouse: <i>Ano2</i><sup>fl/fl</sup></b> | Dr. Thomas J Jentsch's lab | N/A                 |
| <b>Mouse: <i>Nav1.8Cre</i></b>            | Dr. John N. Wood's lab     | N/A                 |
| <b>Rat: Wistar</b>                        | Charles River              |                     |

### Software and Algorithms

|                             |                     |     |
|-----------------------------|---------------------|-----|
| <b>MetaMorph 6.1.3</b>      | Molecular Devices   | N/A |
| <b>pCLAMP 8</b>             | Molecular Devices   | N/A |
| <b>Clamfit 9</b>            | Molecular Devices   | N/A |
| <b>Microsoft Excel 2010</b> | Microsoft           | N/A |
| <b>MAXCHELATOR</b>          | Stanford University | N/A |
| <b>GraphPad Prism 7</b>     | GraphPad Software   | N/A |
| <b>SYSTAT</b>               | SYSTAT Software     | N/A |
| <b>Spike2</b>               | CED                 | N/A |
| <b>SigmaPlot 10</b>         | SYSTAT Software     | N/A |

### Other

|                                                   |                      |            |
|---------------------------------------------------|----------------------|------------|
| <b>NanoDrop 1000</b>                              | Thermo Scientific    |            |
| <b>Model 7000 real-time PCR system</b>            | ABI                  |            |
| <b>Flaming/Brown Micropipette Puller</b>          | Sutter Instrument    | Model P-97 |
| <b>Comprehensive Lab Animal Monitoring System</b> | Columbus Instruments |            |
| <b>Nuclear Magnetic Resonance</b>                 | Bruker Minispec      | LF50       |

|                                       |                               |                |
|---------------------------------------|-------------------------------|----------------|
| <b>(NMR)</b>                          |                               |                |
| <b>glucose meter</b>                  | Abbott                        | CFGS293-M1652  |
| <b>Axopatch 200B Amplifier</b>        | Axon Instrument               |                |
| <b>Microforge</b>                     | Narishige                     | MF830          |
| <b>Digidata 1322A Digitizer</b>       | Axon Instrument               |                |
| <b>Inverted Microscope</b>            | Nikon                         | Eclipse TE-200 |
| <b>RSC-200 rapid solution changer</b> | Bio-Logic Science Instruments |                |

**Table S3. Primer sequences used for real-time PCR**

| Target Gene Fragment  | Genbank Accession | Primer Sequences                              |
|-----------------------|-------------------|-----------------------------------------------|
| <i>Ano1</i><br>127 bp | NM_178642         | Forward: 5'-GAA AAC CAT CAA CTC GGT TCT GC-3' |
|                       |                   | Reverse: 5'-GTC GAA TAG GTG TTG CTT CTC C-3'  |
| <i>Ano2</i><br>141 bp | NM_153589         | Forward: 5'-TTT ATG ATT GCC CTG ACG TTC TC-3' |
|                       |                   | Reverse: 5'-GAG GTT GAT GAT GAC TGC TGT T-3'  |
| CCKR(A)<br>143-bp     | NM_009827         | Forward: 5'-TGT GAT GGT GGT GGC TTA CG-3'     |
|                       |                   | Reverse: 5'-CAT ATC GGC TGC TGC TGC TA-3'     |
| CCKR(B)<br>142 bp     | NM_007627         | Forward: 5'-ACT GAG CCG ACG CCT AAG AA-3'     |
|                       |                   | Reverse: 5'-GCA GAT GAC TGT GCC GAA GA-3'     |
| GAPDH<br>117-bp       | NM_008084         | Forward: 5'-AGC TCA CTG GCA TGG CCT TC-3'     |
|                       |                   | Reverse: 5'-TGC CTG CTT CAC CAC CTT CT-3'     |
